# Supplementary figures and images for: Viral Diversity Threshold for Adaptive Immunity in Prokaryotes
Source: PubMed Central journal article supplement — mBio. 2012 Dec 4;3(6):e00456-12. doi: 10.1128/mBio.00456-12 (PMC3517865; doi:10.1128/mbio.00456-12), 2012-12-04

Fig. S1

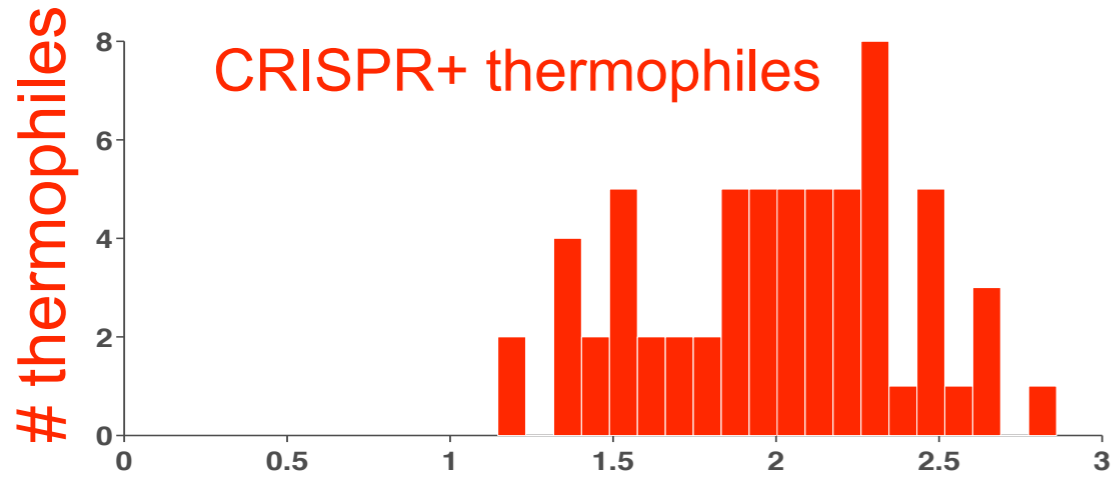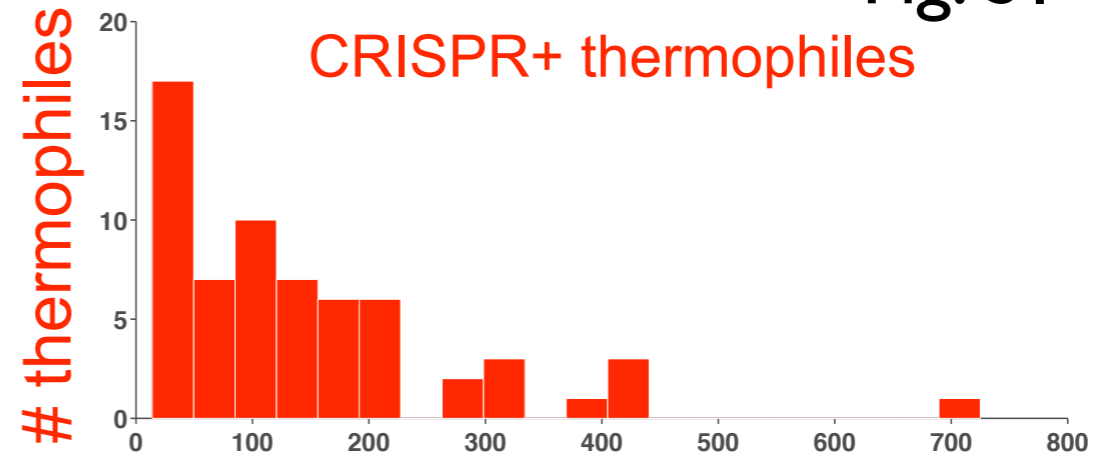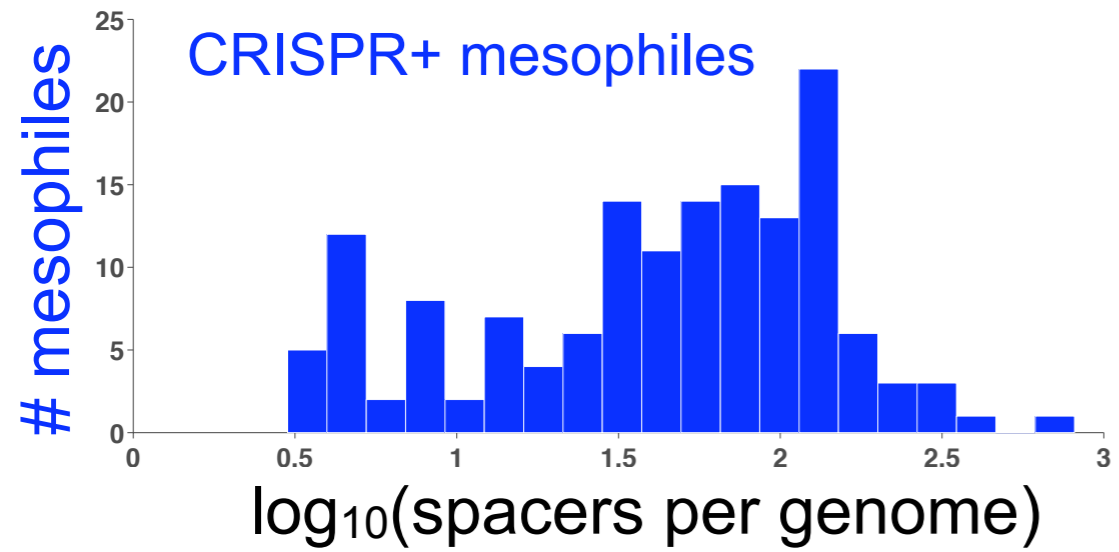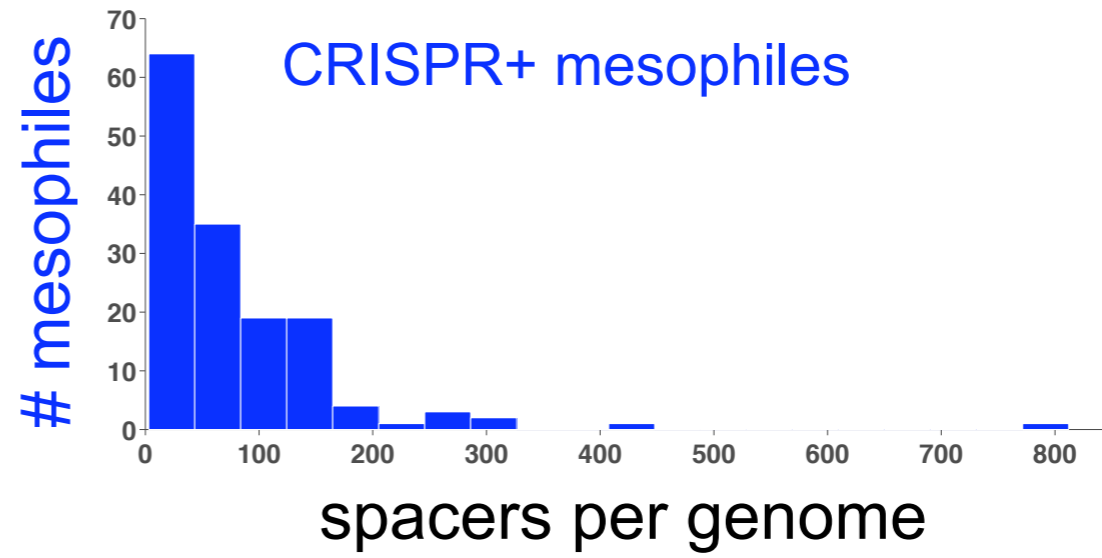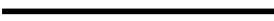

Supplement: mbo005121378sf01.pdf [file mbo005121378sf01.pdf]

Fig. S2

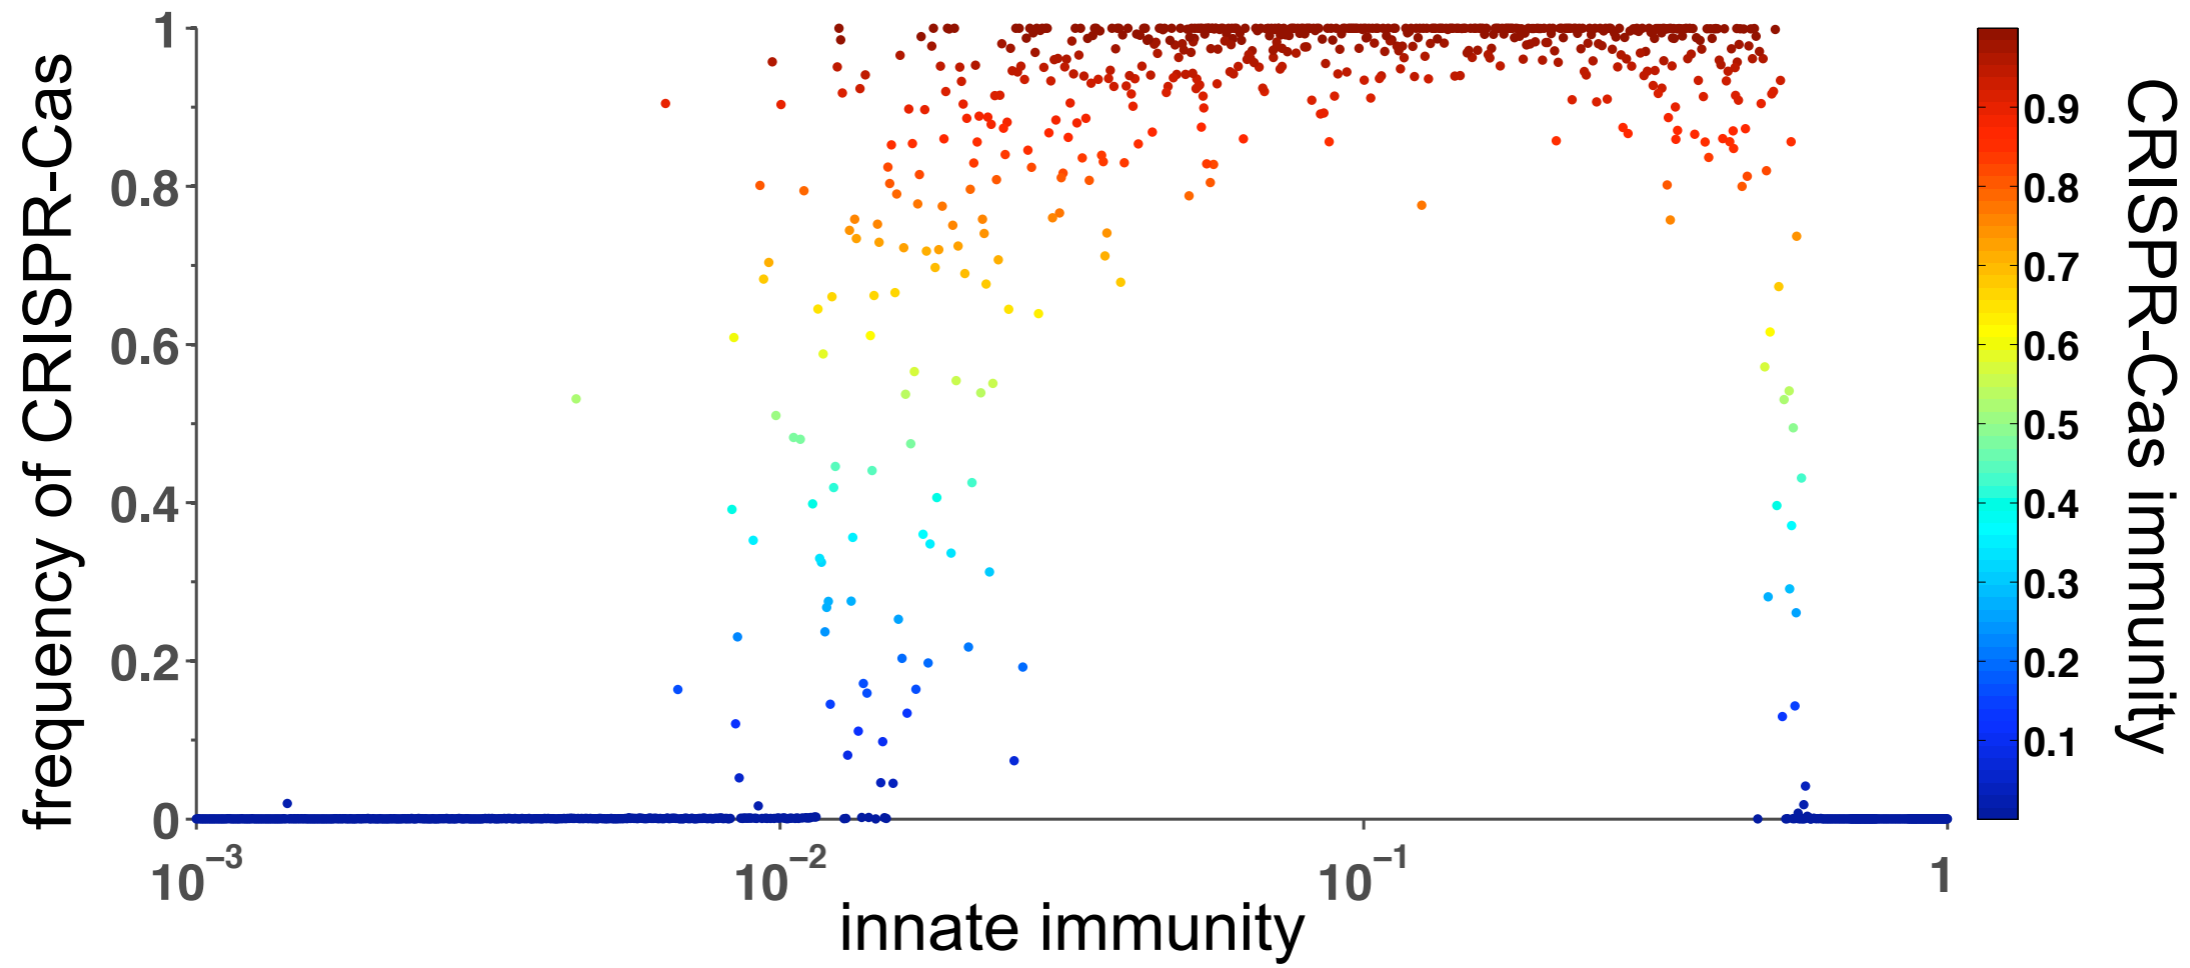

Supplement: mbo005121378sf02.pdf [file mbo005121378sf02.pdf]

Fig. S3

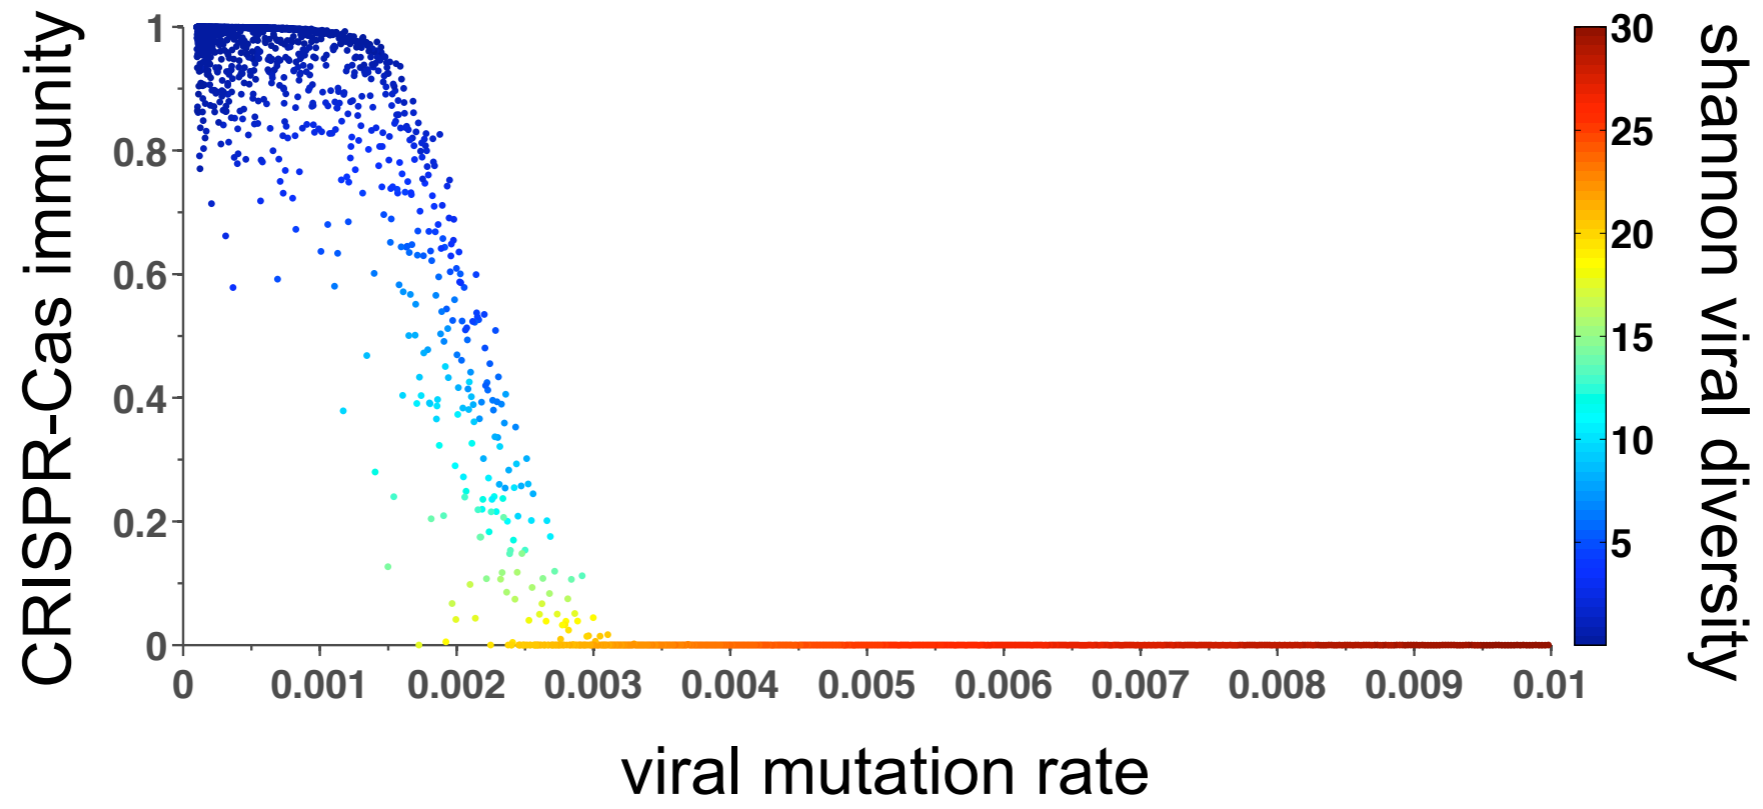

Supplement: mbo005121378sf03.pdf [file mbo005121378sf03.pdf]

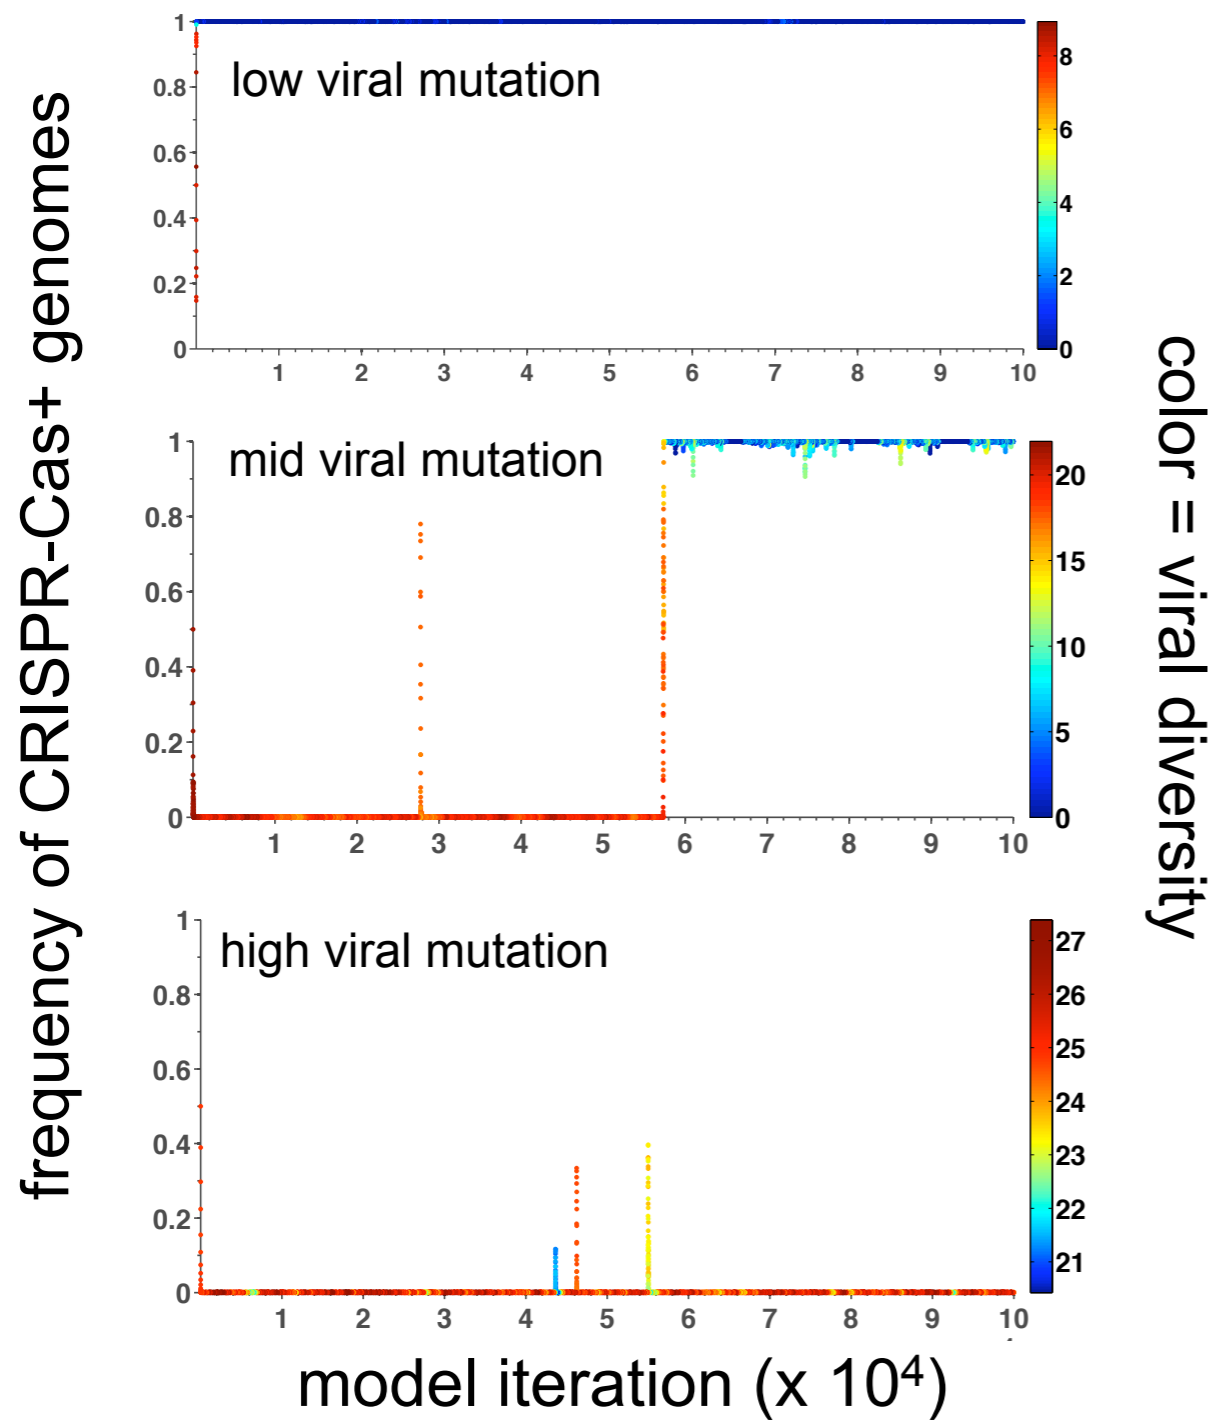

Supplement: mbo005121378sf04.pdf [file mbo005121378sf04.pdf]

Fig. S5

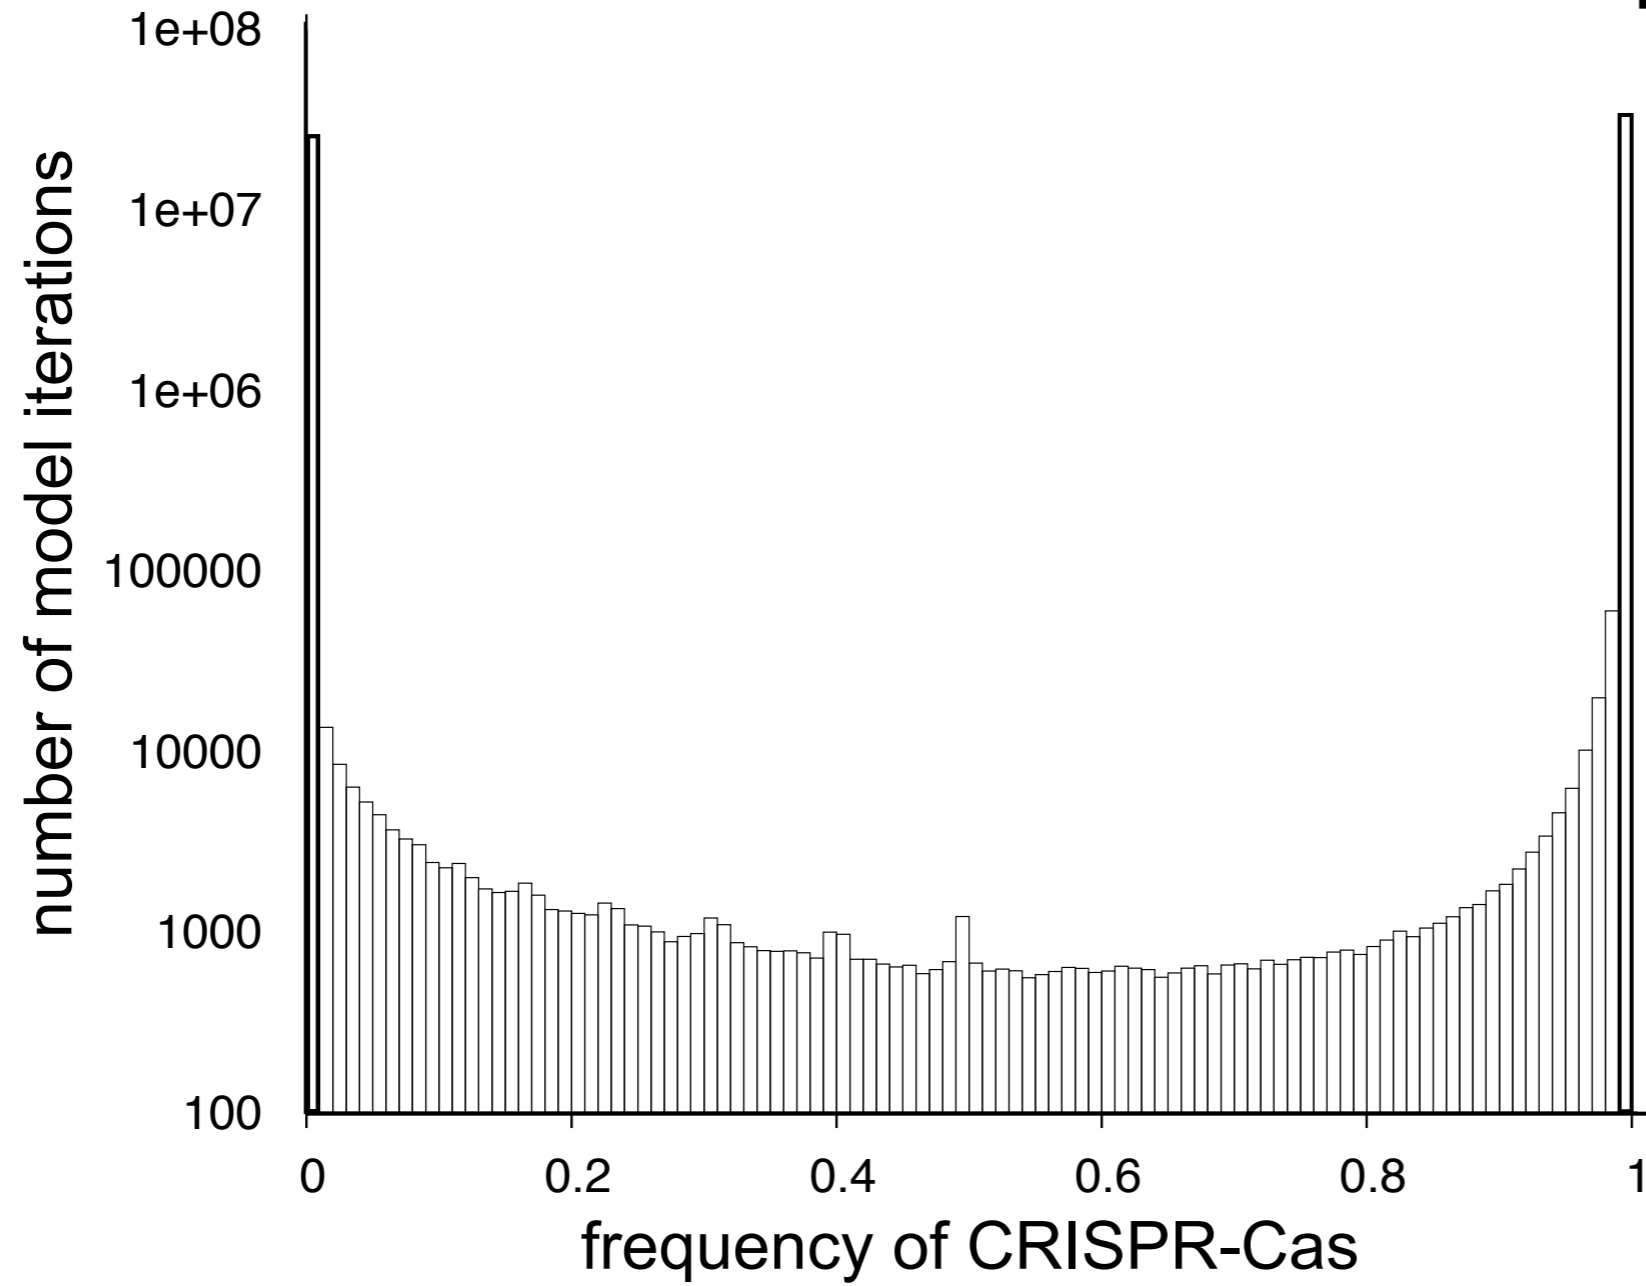

\_\_\_\_\_

Supplement: mbo005121378sf05.pdf [file mbo005121378sf05.pdf]

Fig. S6

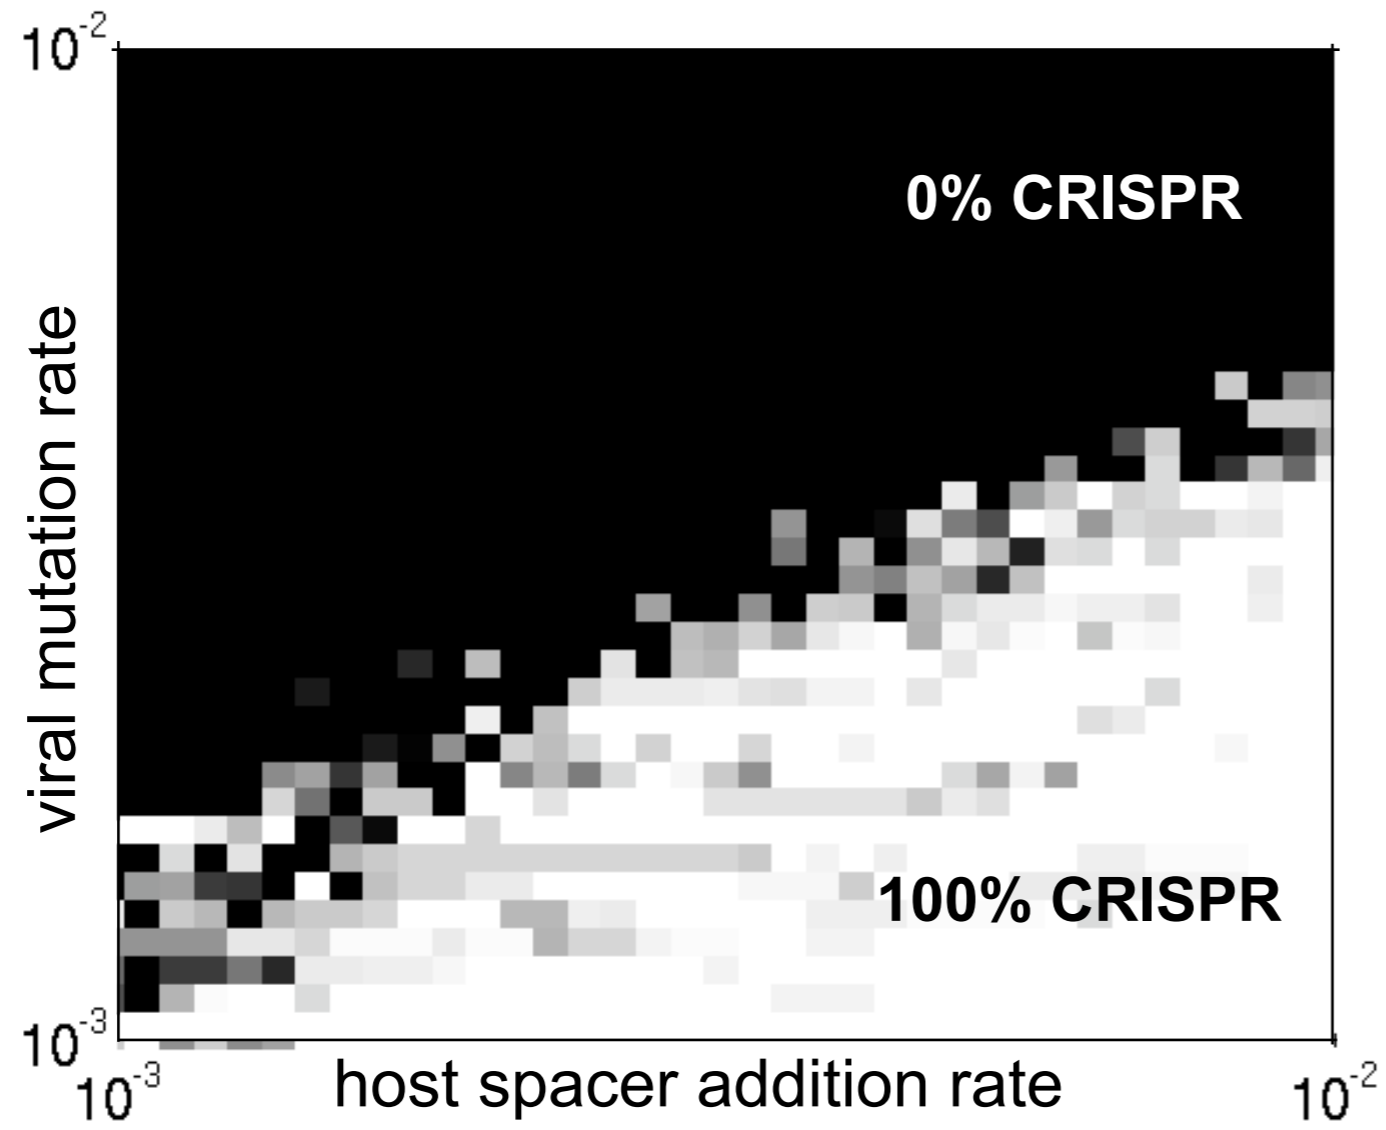

Supplement: mbo005121378sf06.pdf [file mbo005121378sf06.pdf]
